# Supplementary material
Source: Springer Nature journal article supplement (https://www.springermedizin.de/resource/supplementary/12947_2007_167_MOESM2_ESM.pdf/9556370)
Supplement: MOESM2 [file 9556370]

Coronary angiogram

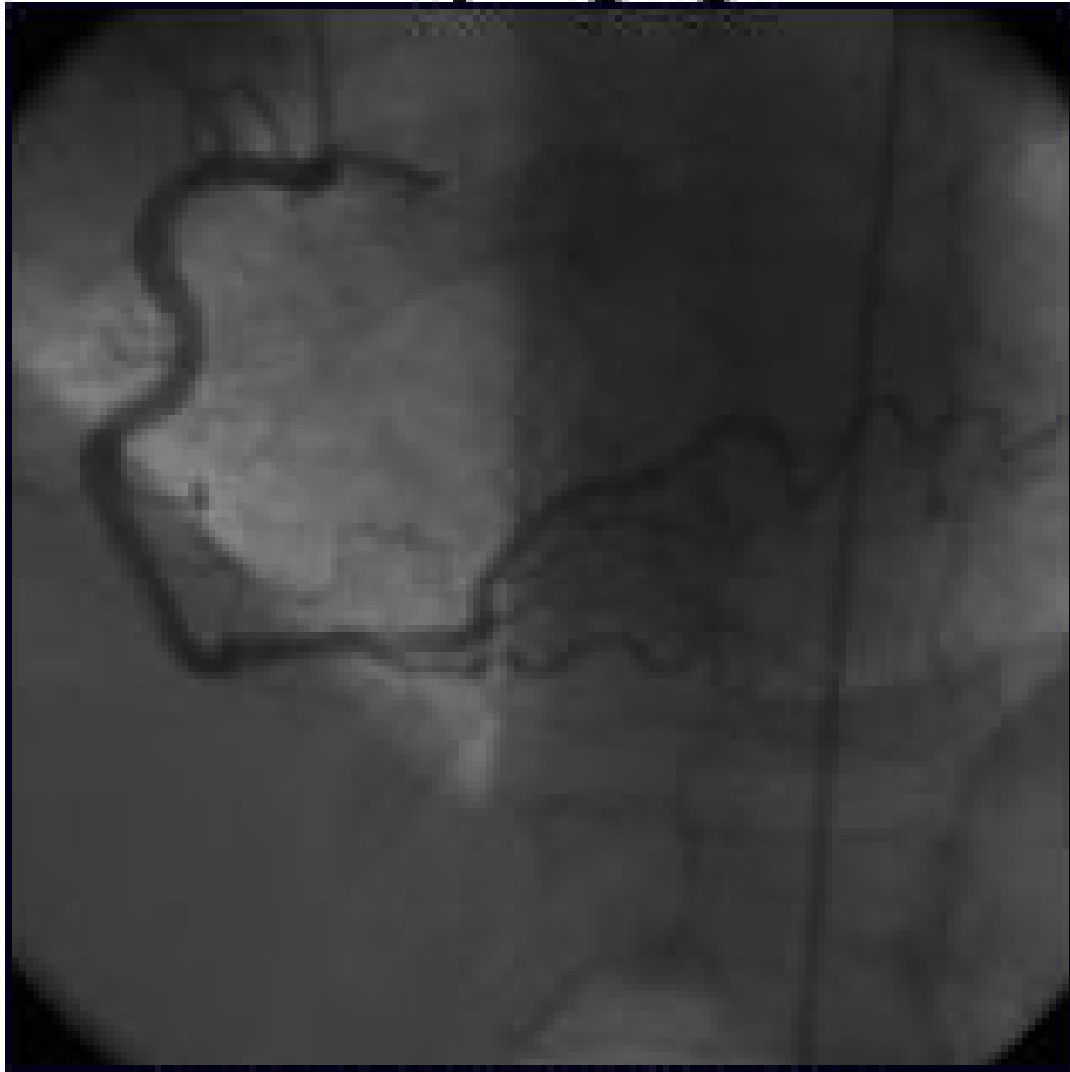

Right coronary artery

Left ventriculography

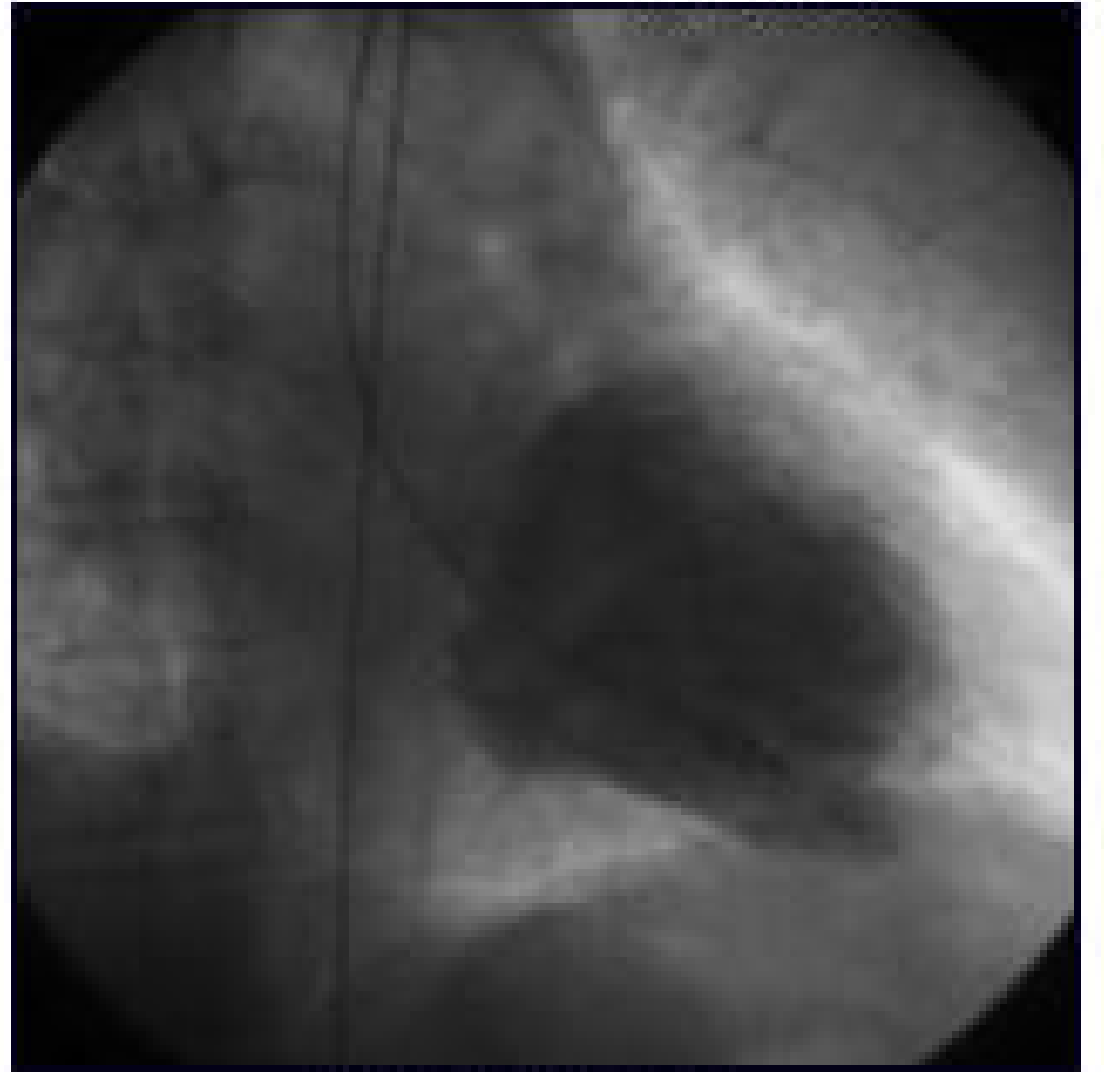

End-diastole

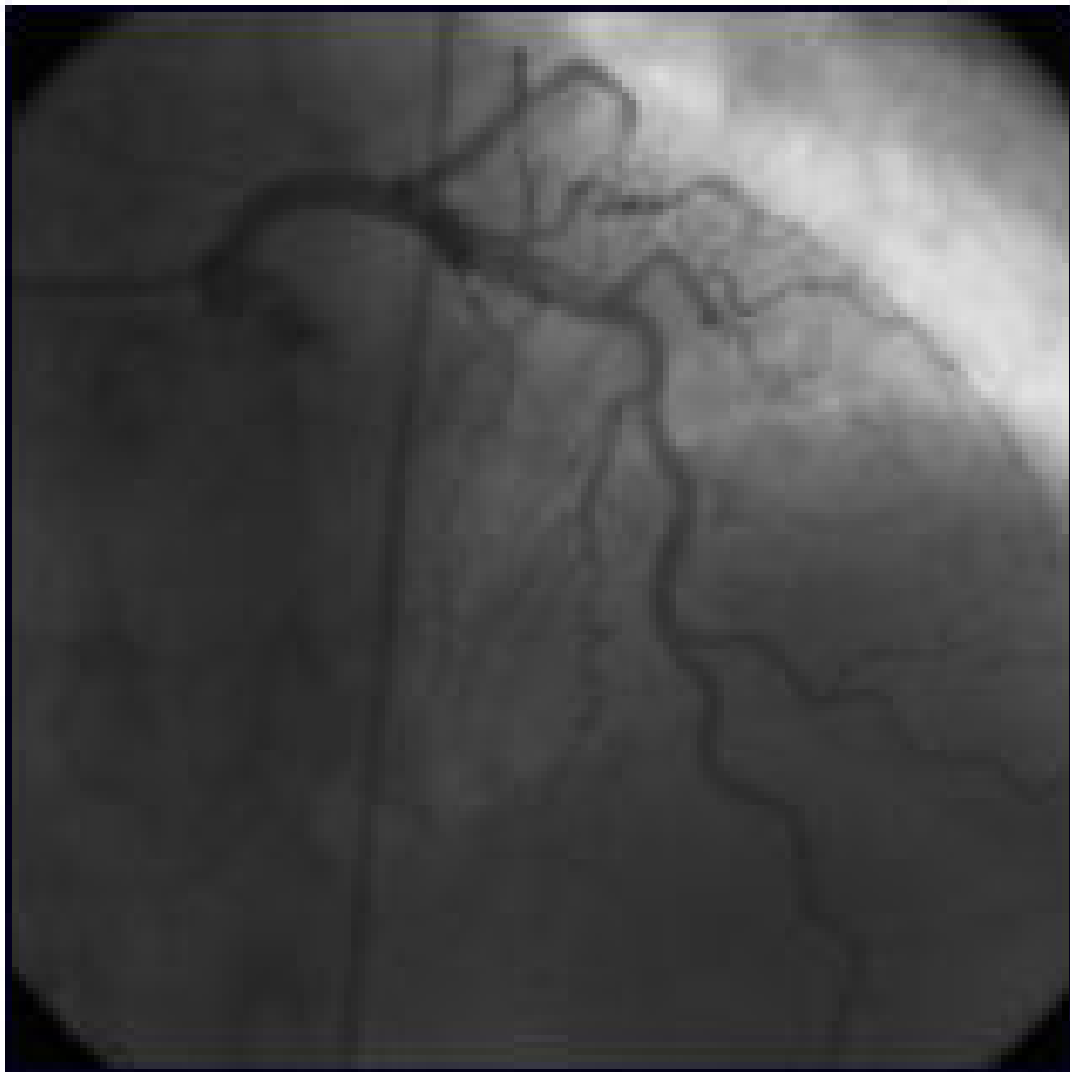

Left coronary artery

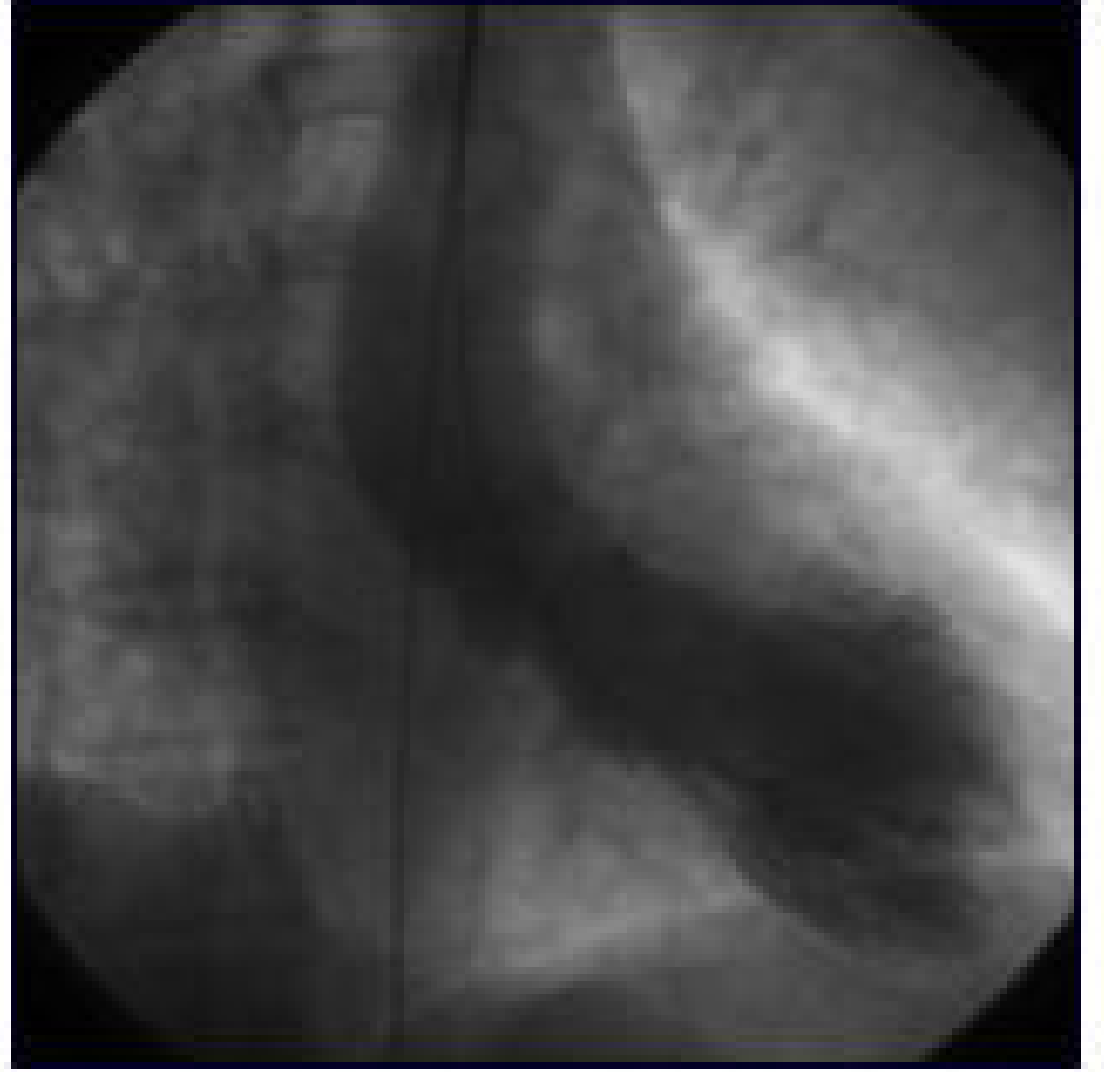

End-systole
